# Supplementary material for: Type I-F CRISPR–Cas provides protection from DNA, but not RNA phages
Source: PubMed Central journal article supplement (PMC6868142; doi:10.1038/s41421-019-0123-9), 2019-10-22
Supplement: 41421_2019_123_MOESM1_ESM.pdf [file 41421_2019_123_MOESM1_ESM.pdf]

1 **Supplementary Materials and Methods**

2

3 **Strains, Plasmids and Growth Conditions**

4 NovaBlue (DE3) [*endA1 hsdR17 (r<sub>K12</sub><sup>-</sup> m<sub>K12</sub><sup>+</sup>) supE44 thi-1*  
5 *recA1 gyrA96 relA1 lac (DE3) F' proA<sup>+</sup>B<sup>+</sup> lacIq*  
6 *ZΔM15::Tn10(Tet<sup>R</sup>)*] cells were cultured at 37°C in liquid LB  
7 or on LB agar, supplemented with 0.1% glucose, 2mM CaCl<sub>2</sub>  
8 and 0.01 mg/ml thiamine. Plasmids used for Csy and Cas1-  
9 2/3 expression are available at AddGene (89232 and 89240,  
10 respectively)<sup>1,2</sup>. CRISPR-DMS3 is available at AddGene  
11 (89244)<sup>1</sup>, while the other CRISPRs were designed,  
12 synthesized, and cloned into a PMK vector (**Supplementary**  
13 **Fig. S1**). CRISPR-λ contains four spacer sequences that  
14 target four Lambda phage genes (J, O, R and E). Growth  
15 media is supplemented with ampicillin to maintain the pCys1-  
16 4, spectinomycin to maintain pCas1-2/3, and kanamycin to  
17 maintain pCRISPR. Additionally, tetracycline is provided in  
18 the growth media for the selection of F' episome in NovaBlue  
19 (DE3). In NovaBlue (DE3) cells, the induction of expression  
20 vectors was achieved on LB Agar plates with 0.001mM  
21 isopropyl-D-1-thiogalactopyranoside (IPTG).

22

23 **Synthetic CRISPR array construction**

24 Three different CRISPR arrays was assembled that each  
25 contains six spacer sequences to target MS2 phage.  
26 Overlapping oligonucleotides (Eurofins Genomics) were  
27 annealed and extended at 72°C with Q5 polymerase to  
28 synthesize small fragments containing repeat-spacer-repeat.  
29 Small fragments were combined using overlap PCR extension  
30 and the final CRISPR was cloned using SacI and EcoRI sites  
31 (**Supplementary Fig. S1**). Each clone was sequenced  
32 (Genscript). Each CRISPR contains six spacers (32-bps)  
33 flanked by 28-bp repeats. Spacers were selected from a  
34 variety of locations on the MS2 genes based on the availability  
35 of the PAM or PAM-like region. CRISPRs were designed  
36 using the canonical model or non-canonical binding models  
37 proposed by Li *et al*<sup>3</sup>.

38

### 39 **Phage replication and Plaque Assays**

40 *E. coli* BL21 (DE3) and K12 ER2738 used to propogagte  
41 Lambda\_vir and MS2 phages, respectively. K12 ER2738  
42 contains an F' episome under tetracycline selection, which  
43 provides receptor for the MS2 phage attachment. 100mls of  
44 *E. coli* BL21 (DE3) and K12 ER2738 cells were grown to  
45 OD<sub>600</sub> of 0.5 and then infected with 100µl of corresponding  
46 phage. Cultures containing phage were agitated overnight at

47 37°C. Cell lysates were collected by centrifugation (4000g for  
48 30 minutes). A 0.2µm filter was used to remove particulates from cell  
49 lysate. 100mls of the cell lysates were concentrated into 5ml  
50 and tittered by plaque assay. Tittering was performed using  
51 100µl of *E. coli* cells grown to OD<sub>600</sub> of 0.5. These cells were  
52 mixed with 100µl of phage or 10-fold dilutions of each phage,  
53 incubated for 30 mins and shaken every 10 mins. 5mls of  
54 molten 0.8% LB/agarose was added to the cell slurry and the  
55 soft agar was poured over the top of an LB-agar plate. Plates  
56 were incubated at 37°C overnight and plaques were counted  
57 the following day.

58

### 59 **Spot Plaque assay**

60 *E. coli* NovaBlue (DE3) cells were cultivated with appropriate  
61 antibiotics to maintain plasmids and challenge with  
62 Lambda\_vir (dsDNA) (University of Laval, reference phage  
63 HER 37) or MS2 (+ssRNA) phages (ATCC 15597). NovaBlue  
64 (DE3) cells were grown to an OD<sub>600</sub> of 0.9 and 400µl of the  
65 bacterial culture is mixed with molten 0.8% LB/agarose and  
66 poured over a solid agar. 5µl of each phage dilution were  
67 spotted on the top agar and the plates were incubated at 37°C  
68 overnight. Plates were evaluated the following day.

69

70 **Quantification and statistical analysis**

71 **Efficiency of Plaquing (EOP)**

72 Efficiency of plaquing (EOP) is reported as a ratio of PFUs  
73 formed on the experimental (i.e. CRISPR containing) strain  
74 divided by the number of PFUs on a wild-type. Plaque assays  
75 were performed in triplicate and the EOP is the  $\pm$  standard  
76 deviation.

77 Supplementary Figure S1

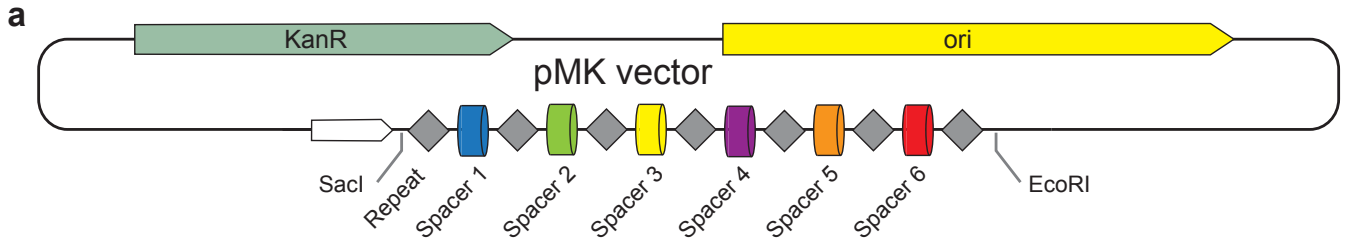

**b**

|  | CRISPR-1 |            | CRISPR-2 |            | CRISPR-3 |            |
|--|----------|------------|----------|------------|----------|------------|
|  | Spacer   | MS2        | Spacer   | MS2        | Spacer   | MS2        |
|  | Spacer-1 | MS2_380bp  | Spacer-1 | MS2_380bp  | Spacer-1 | MS2_465bp  |
|  | Spacer-2 | MS2_979bp  | Spacer-2 | MS2_979bp  | Spacer-2 | MS2_1007bp |
|  | Spacer-3 | MS2_1491bp | Spacer-3 | MS2_1491bp | Spacer-3 | MS2_1569bp |
|  | Spacer-4 | MS2_2351bp | Spacer-4 | MS2_2351bp | Spacer-4 | MS2_2256bp |
|  | Spacer-5 | MS2_2803bp | Spacer-5 | MS2_2803bp | Spacer-5 | MS2_2719bp |
|  | Spacer-6 | MS2_3369bp | Spacer-6 | MS2_3369bp | Spacer-6 | MS2_3236bp |

  

|  | CRISPR-A |           | CRISPR-DMS3 |              |
|--|----------|-----------|-------------|--------------|
|  | Spacer   | MS2       | Spacer      | MS2          |
|  | Spacer-J | λ_18616bp | Spacer      | DMS3_12521bp |
|  | Spacer-O | λ_39036bp |             |              |
|  | Spacer-R | λ_45831bp |             |              |
|  | Spacer-E | λ_6328bp  |             |              |

**C**

CRISPR-1 array

**TAATACGACTCACTATAGG**GC GAATTGAAGGAAGGCCGTCAAGGCCGCATGAGCTC**GTTCACTGCCGTGTAGGCA**  
**GCTAAGAAA**CATCTGCCTGCGAACTGGCTCGTTGTAGGC**GTTCACTGCCGTGTAGGCAGCTAAGAAA**GACGCGT  
GCACGTAGCACC GGACGACAACCAT**GTTCACTGCCGTGTAGGCAGCTAAGAAAA**CGTGCGTGGCTCGATCGTCTGTT  
ACTTTGTAA**GTTCACTGCCGTGTAGGCAGCTAAGAAA**CACATGTCGACGCAGTAGCCTCCCTACAACGAG**GTTCACTG**  
**CCGTGTAGGCAGCTAAGAAA**TGCCAAGCGCGCATGAGCCGGTCCCCGTAGAT**GTTCACTGCCGTGTAGGCAGCTAA**  
**GAAA**CAGGTCGCGACCTGCGTGGGGCGTTAGCCAC**GTTCACTGCCGTGTAGGCAGCTAAGAAA**

CRISPR-2 array

**TAATACGACTCACTATAGG**GC GAATTGAAGGAAGGCCGTCAAGGCCGCATGAGCTC**GTTCACTGCCGTGTAGGCAG**  
**CTAAGAAA**CGACCCACGATGACCCACTTCGTTGTAGGC**GTTCACTGCCGTGTAGGCAGCTAAGAAA**GTGGGTTT  
AAGATACCTAGAGACGACAACCAT**GTTCACTGCCGTGTAGGCAGCTAAGAAAA**GCTCTGACGAACGCTACAGGTTAC  
TTTGTAA**GTTCACTGCCGTGTAGGCAGCTAAGAAA**CGGAACTGTAAACACTCCGTTCCCTACAACGAG**GTTCACTGCC**  
**GTGTAGGCAGCTAAGAAA**TCACTGGGACATATAATATCGTCCCCGTAGAT**GTTCACTGCCGTGTAGGCAGCTAAGAAA**  
CCTGAGGGAATGTGGGAACCGCGTTAGCCAC**GTTCACTGCCGTGTAGGCAGCTAAGAAA**

CRISPR-3 array

**TAATACGACTCACTATAGG**GC GAATTGAAGGAAGGCCGTCAAGGCCGCATGAGCTC**GTTCACTGCCGTGTAGGCA**  
**GCTAAGAAA**GGTTGCAACGTTCTGCGGCACCTTCGATGTAA**GTTCACTGCCGTGTAGGCAGCTAAGAAA**TACAGGT  
AGGAGCCAGTCGACAACGAATGAGA**GTTCACTGCCGTGTAGGCAGCTAAGAAA**ATATTTAAGTACGAACGCCATGC  
GGCTACAGG**GTTCACTGCCGTGTAGGCAGCTAAGAAA**GCGTGTCTGATCCACGGCGCACATTGGTCTC**GGTTAC**  
**TGCCGTGTAGGCAGCTAAGAAA**AAAAATGGATTTGGTGCCTTTGACTATTGCC**GTTCACTGCCGTGTAGGCAGCT**  
**AAGAAA**AACGCTATGTAGCGACCACTGTCGTGCTTTTCG**GTTCACTGCCGTGTAGGCAGCTAAGAAA**

CRISPR-λ array

**GTTCACTGCCGTGTAGGCAGCTAAGAAA**GCTGACGTTTCGCGGAAGTAAGCGTACTGTCA**GTTCACTGCCGTGTAG**  
**GCAGCTAAGAAA**CTCAAAACGAGGGAAAATCCCCTAAAACGAGG**GTTCACTGCCGTGTAGGCAGCTAAGAAA**GTCA  
GGCAATCGACCGTTGCAGCAATATCTGG**GTTCACTGCCGTGTAGGCAGCTAAGAAA**CGTGCGGCTCCACCTCTG  
AATTTACGCCGGG**GTTCACTGCCGTGTAGGCAGCTAAGAAA**CAGGTAGACGCGGACATCAAGCCC GCCGTGAAAG  
GTTCACTGCCGTGTAGGCAGCTAAGAAA

CRISPR-DMS3 array

**TAATACGACTCACTATAGG****GTTCACTGCCGTGTAGGCAGCTAAGAAA**ATTCACGGCGGGCTTGATGTCCGCGTCTACC  
TG**GTTCACTGCCGTGTAGGCAGCTAAGAAA**ATTCACGGCGGGCTTGATGTCCGCGTCTACCT**GGTTCACTGCCGTGT**  
**AGGCAGCTAAGAAA**ATTCACGGCGGGCTTGATGTCCGCGTCTACCTG**GTTCACTGCCGTGTAGGCAGCTAAGAAA**TT  
CACGGCGGGCTTGATGTCCGCGTCTACCTG**GTTCACTGCCGTGTAGGCAGCTAAGAAA**ATTCACGGCGGGCTTGATG  
TCCGCGTCTACCT**GGTTCACTGCCGTGTAGGCAGCTAAGAAA**ATTCACGGCGGGCTTGATGTCCGCGTCTACCTG**GT**  
**TCACTGCCGTGTAGGCAGCTAAGAAA**ATTCACGGCGGGCTTGATGTCCGCGTCTACCTG**GTTCACTGCCGTGTAGGC**  
**AGCTAAGAAA**

78 **Supplementary Fig. S1. CRISPR design.**

79 **(a)** Plasmid map of pMK vector containing six spacer

80 sequences designed to target the RNA genome of MS2

81 phage. Each CRISPR array contains six (32-bps) spacers

82 flanked by 28-bp repeats, cloned into the pMK backbone

83 using SacI and EcoRI restriction sites. **(b)** Schematic of each

84 crRNA mapped onto the target sequence. The flanking PAM-

85 like (red) or PAM (green) sequences are indicated and

86 corresponding “core” or “seed” sequences are highlighted  
87 with a gray column. Each of the six spacers in CRISPR-1 and  
88 -2 target identical sequences that are flanked by a PAM-like  
89 motif, while CRISPR-3 spacers target proximal protospacers  
90 with a PAM. CRISPR- $\lambda$  contains four spacer sequences that  
91 target four Lambda phage genes (J, O, R and E). CRISPR-  
92 DMS3 (negative control) contains seven identical spacers that  
93 target gene 24 in the DMS3 genome. **(c)** Sequences of the  
94 synthetic CRISPR loci. Spacers are separated by repeats  
95 (yellow). crRNA expression is under control of a T7 promoter  
96 (bold underline).

97

98

- 99 1. Chowdhury, S. *et al.* Structure Reveals Mechanisms of  
100 Viral Suppressors that Intercept a CRISPR RNA-Guided  
101 Surveillance Complex. *Cell* **169**, 47-57.e11 (2017).
- 102 2. Rollins, M. F. *et al.* Cas1 and the Csy complex are opposing  
103 regulators of Cas2/3 nuclease activity. *Proc. Natl. Acad.*  
104 *Sci. U.S.A.* **114**, E5113–E5121 (2017).
- 105 3. Li, R. *et al.* Type I CRISPR-Cas targets endogenous  
106 genes and regulates virulence to evade mammalian host  
107 immunity. *Cell Research* **26**, 1273–1287 (2016).
